# Supplementary figures and images for: The transcription factor XBP1s restores hippocampal synaptic plasticity and memory by control of the Kalirin-7 pathway in Alzheimer model
Source: PubMed Central journal article supplement — Mol Psychiatry. 2016 Sep 20;22(11):1562–75. doi: 10.1038/mp.2016.152 (PMC5658671; doi:10.1038/mp.2016.152), 2016-09-20

□ NTG/empty    ■ AD/empty    ■ AD/XBP1s

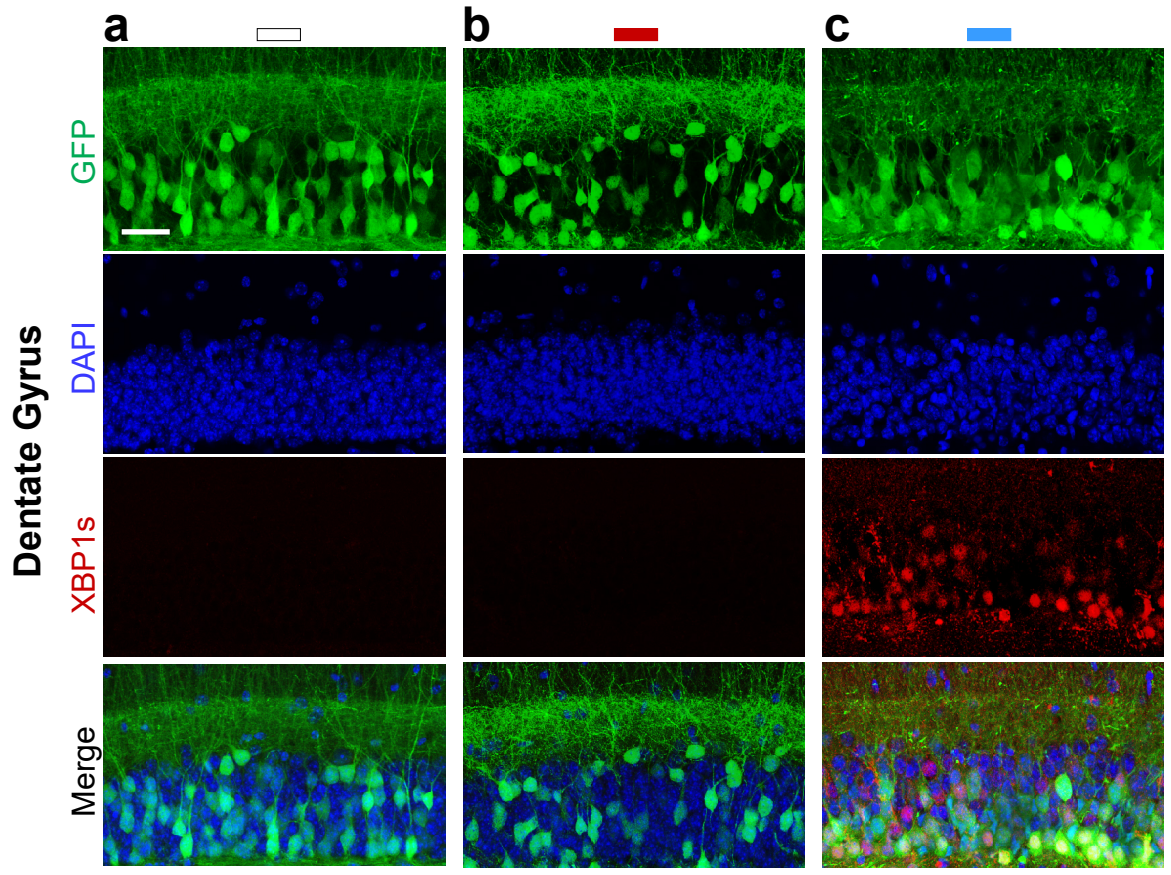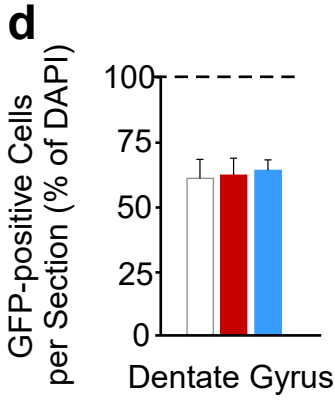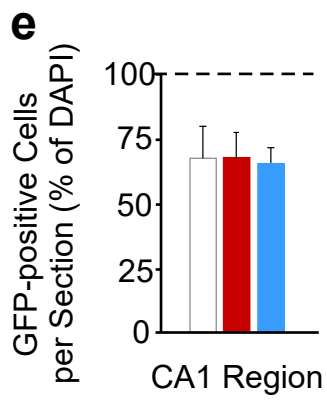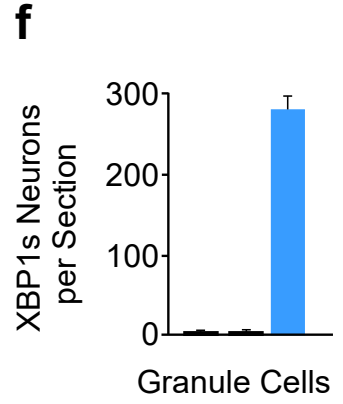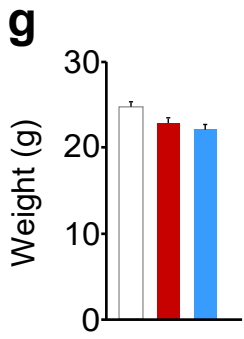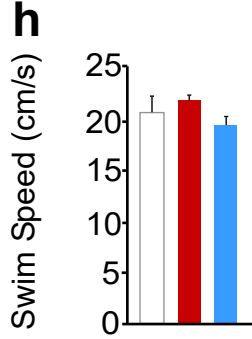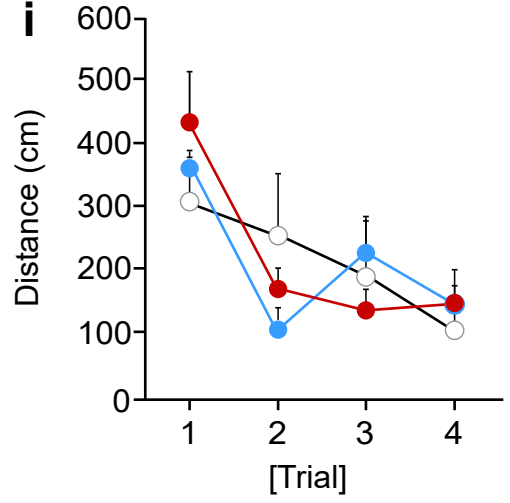

Supplementary Figure 1

Supplement: mp2016152x1.pdf [file mp2016152x1.pdf]

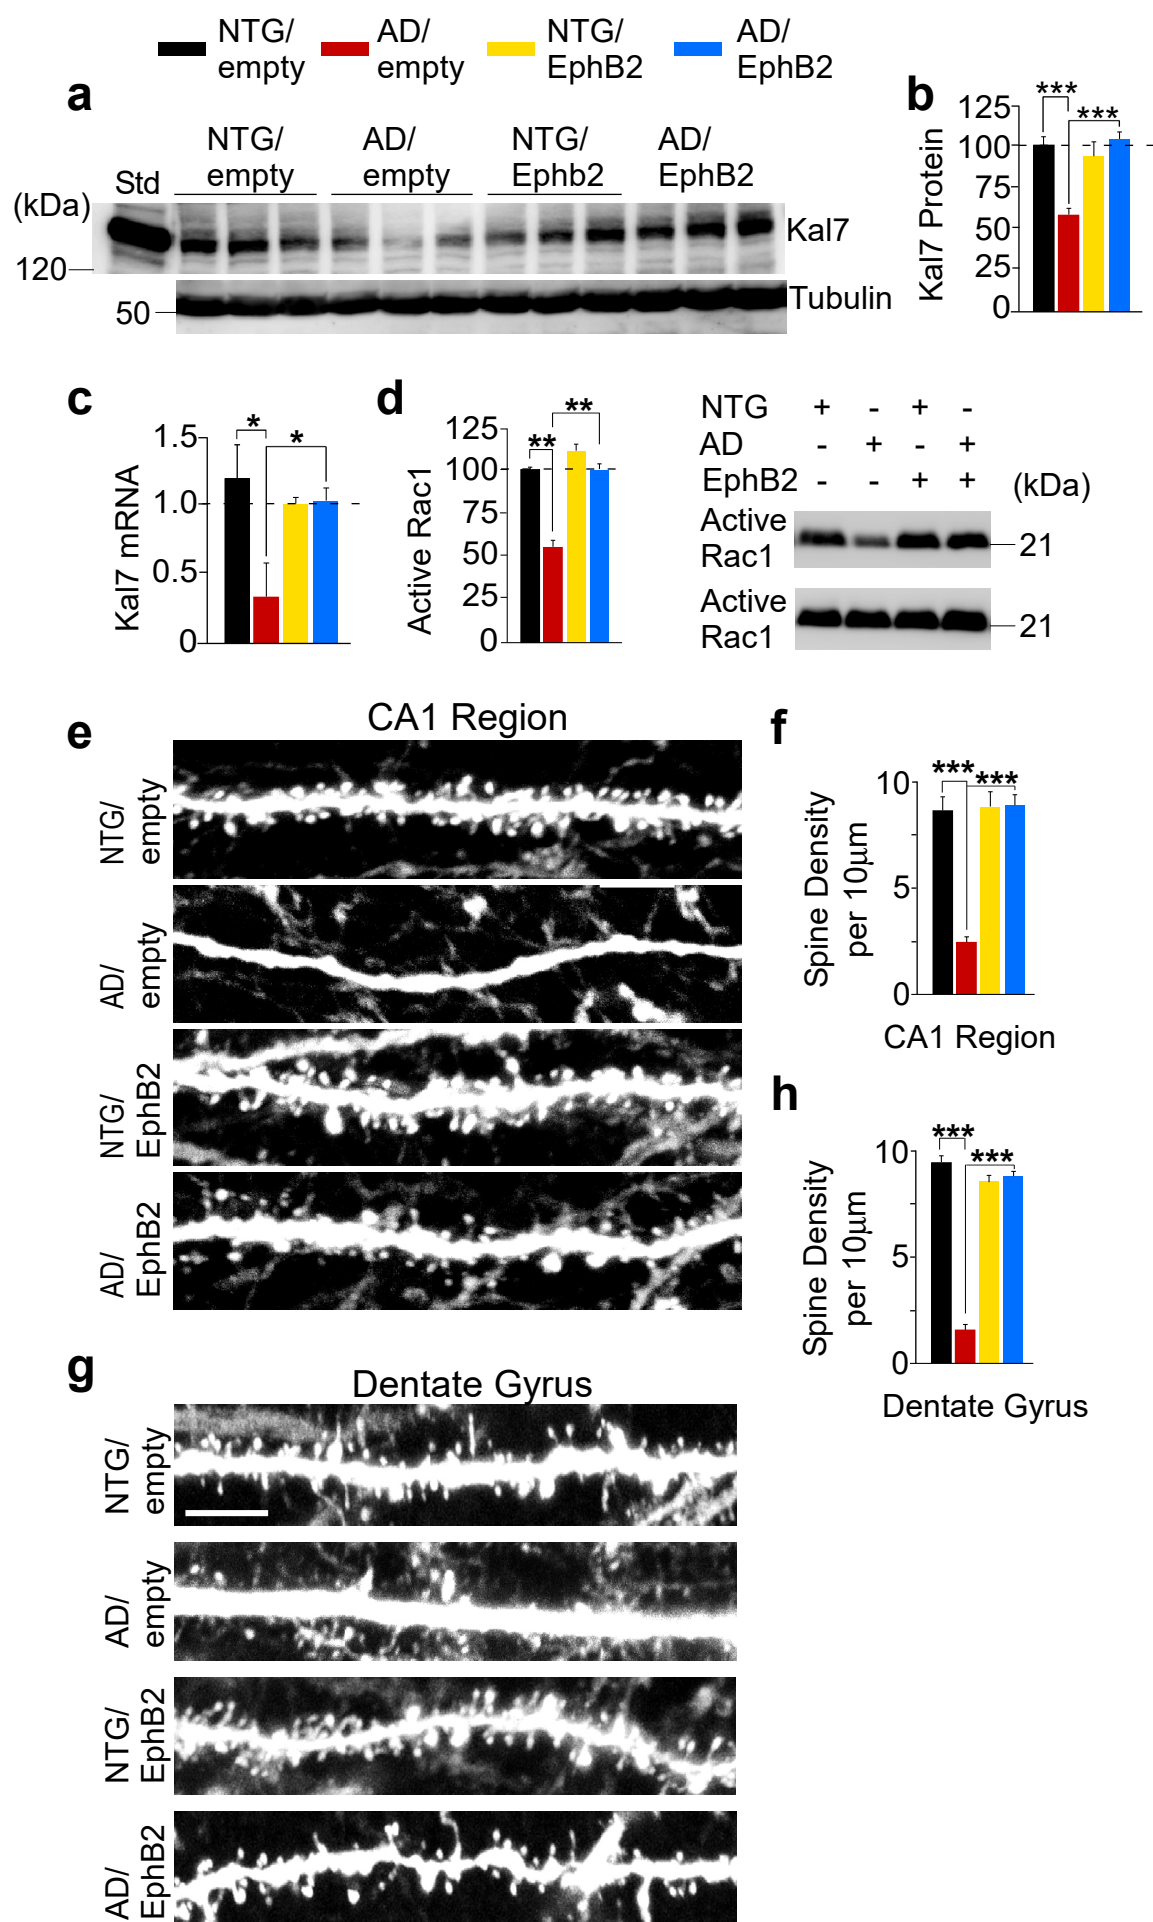

Supplementary Figure 10

Supplement: mp2016152x10.pdf [file mp2016152x10.pdf]

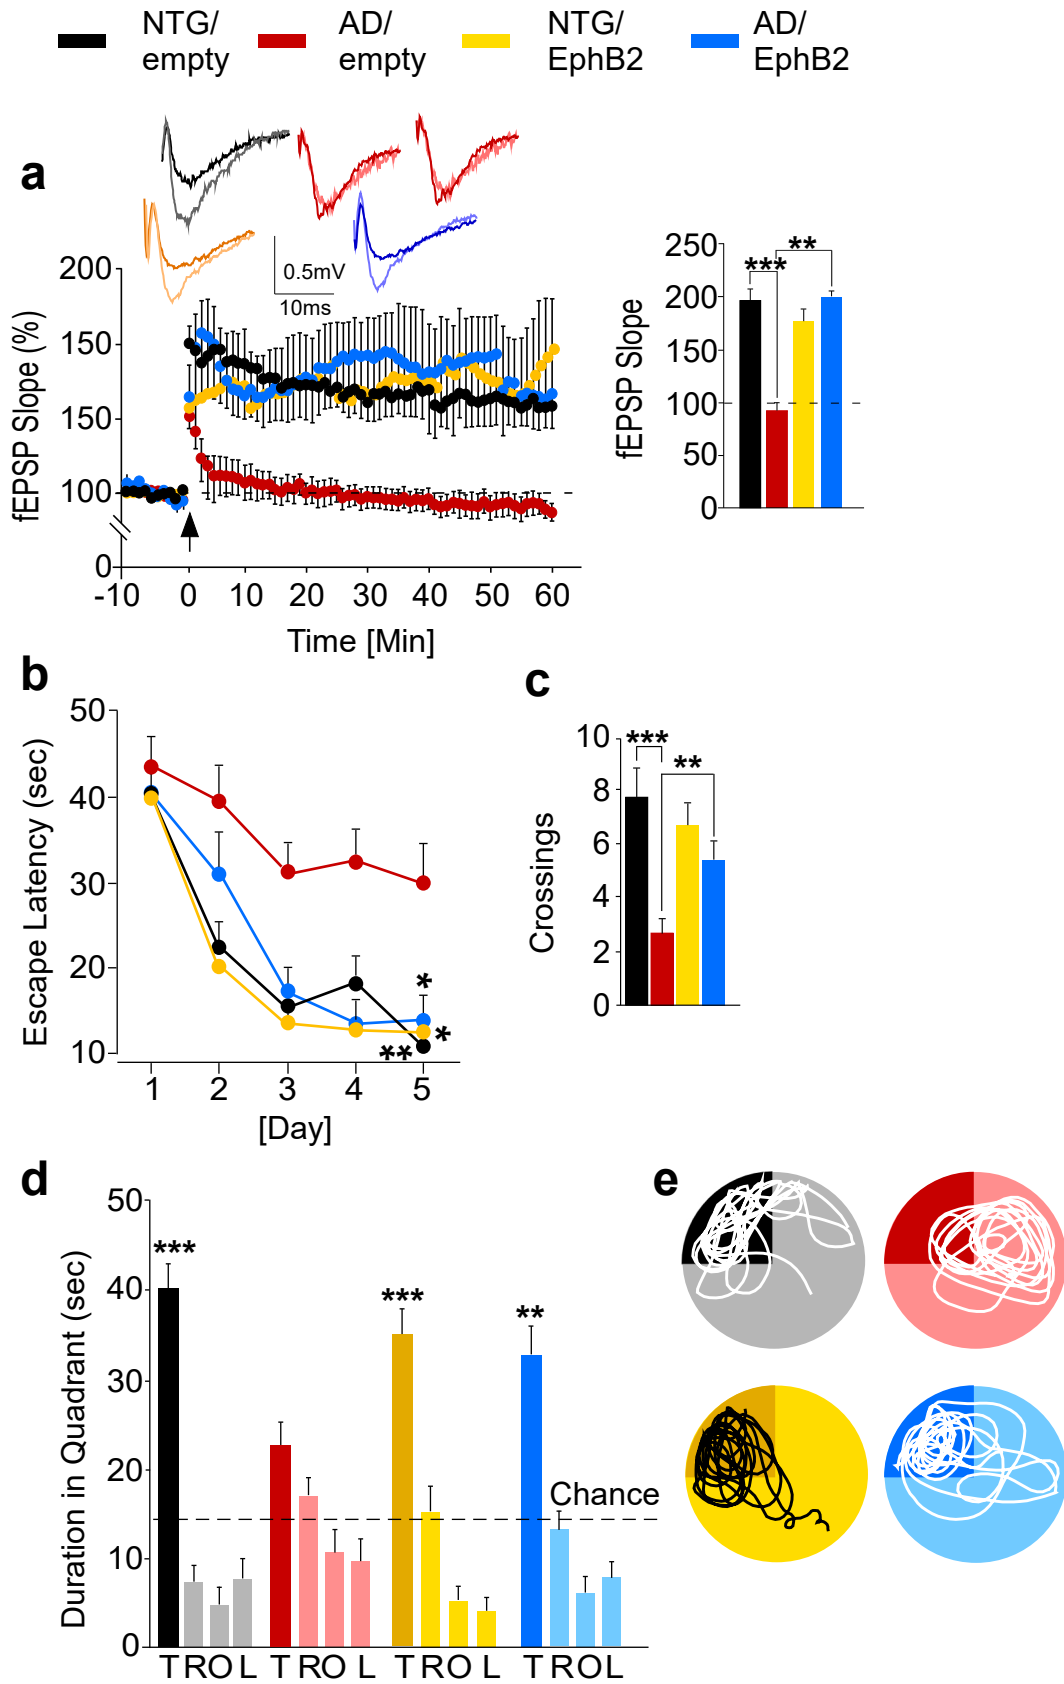

Supplementary Figure 11

Supplement: mp2016152x11.pdf [file mp2016152x11.pdf]

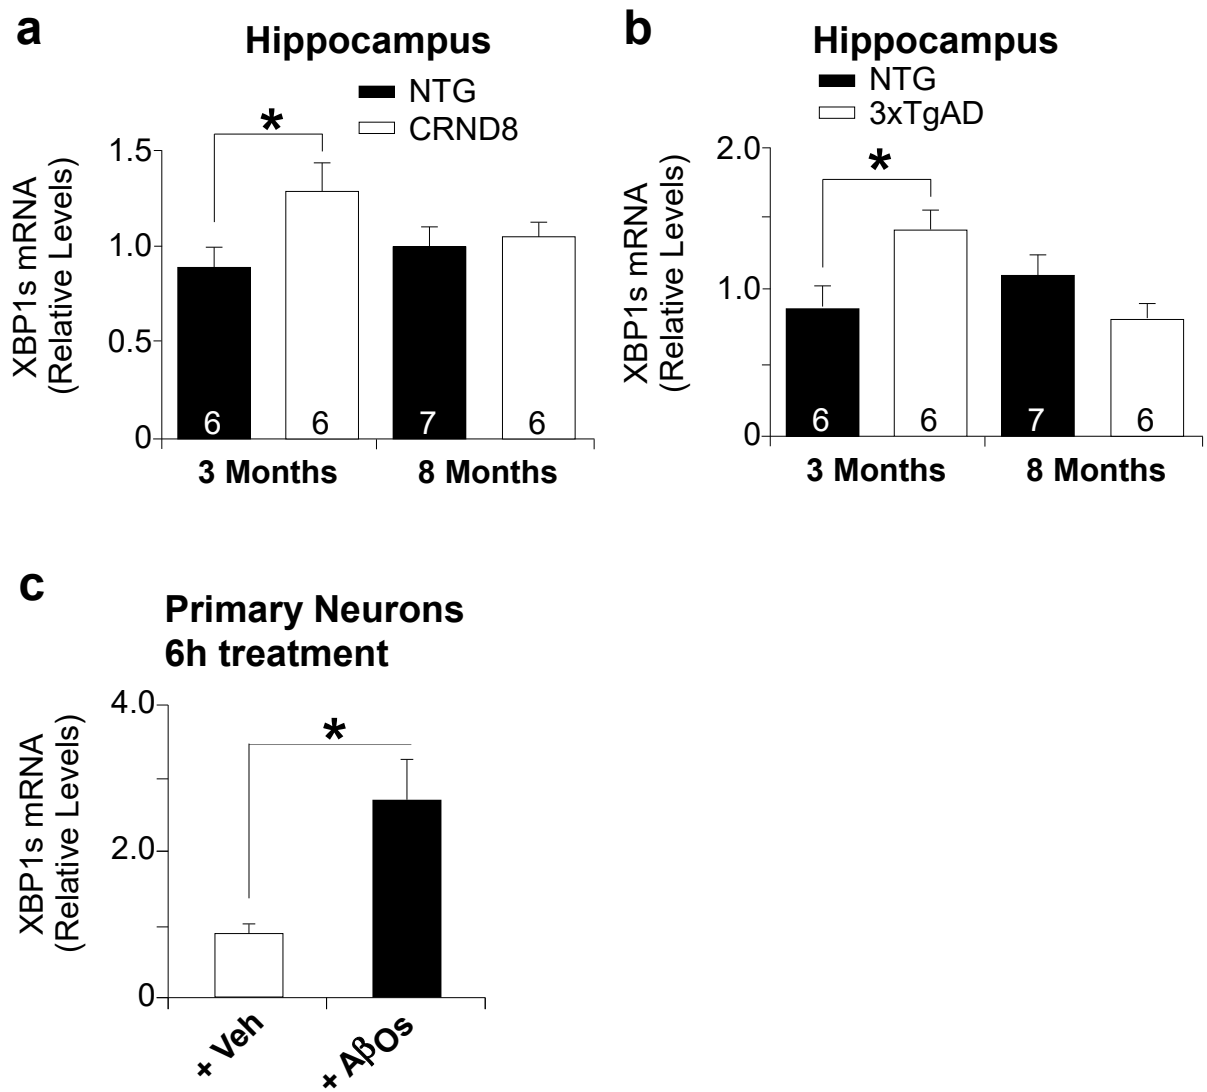

Supplementary Figure 12

Supplement: mp2016152x12.pdf [file mp2016152x12.pdf]

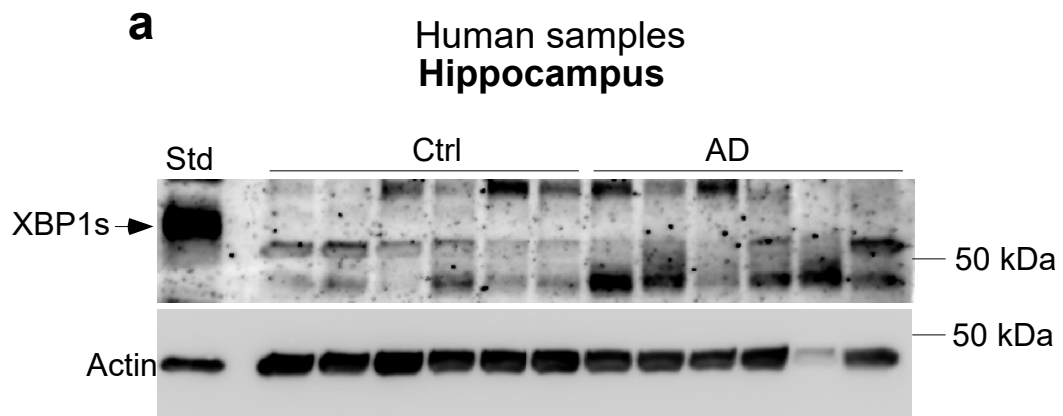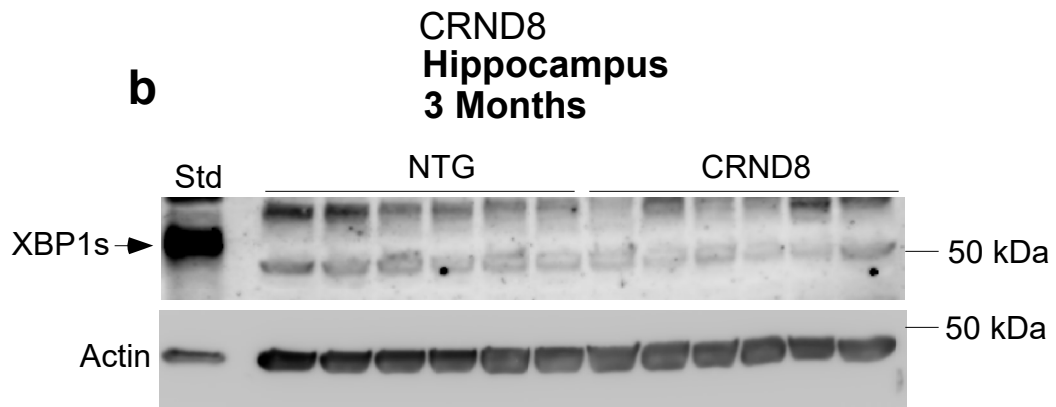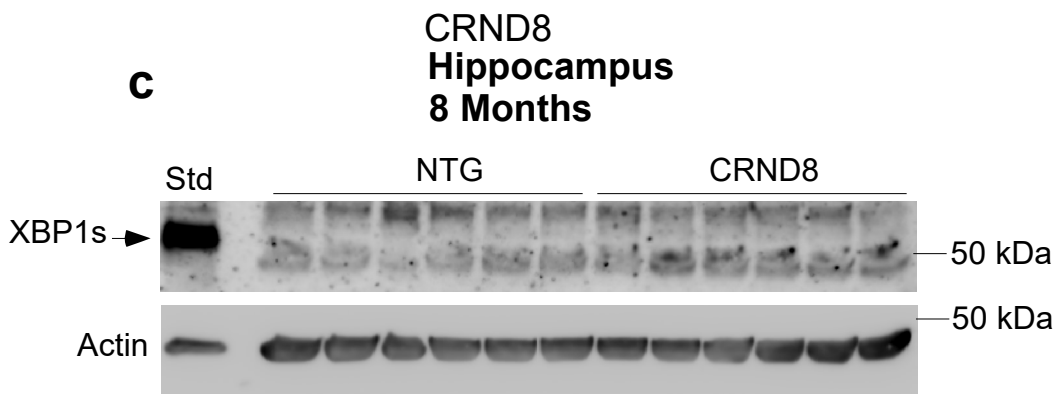

Supplementary Figure 13

Supplement: mp2016152x13.pdf [file mp2016152x13.pdf]

NTG/shSCR/empty    
 AD/shSCR/XBP1s    
 AD/shEphB2/XBP1s  
 AD/shSCR/empty    
 AD/shKal7/XBP1s

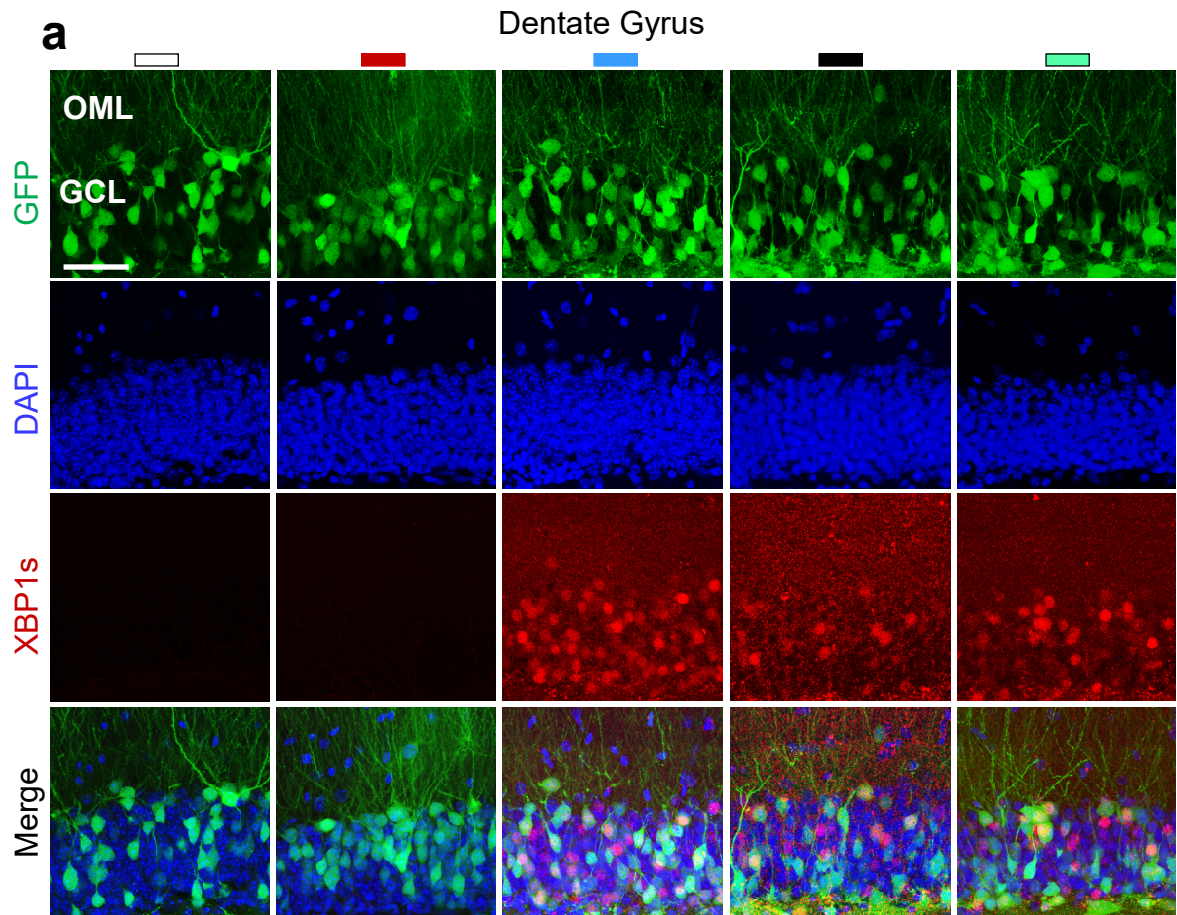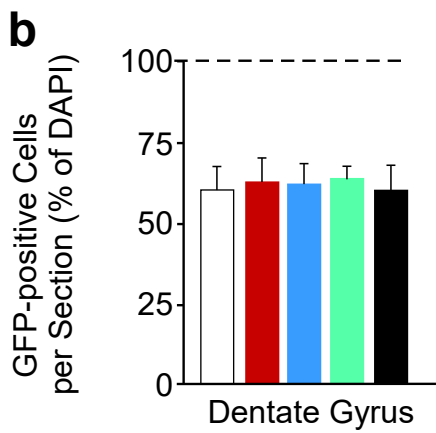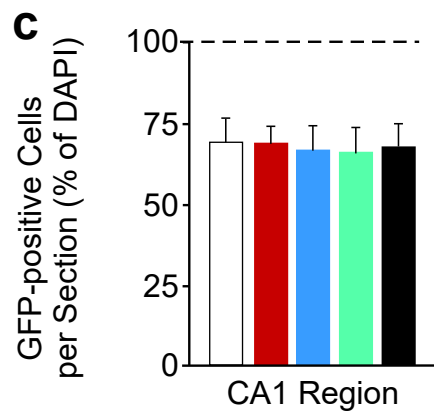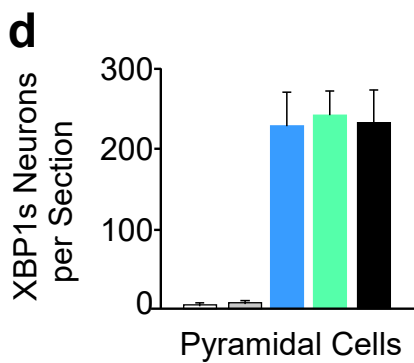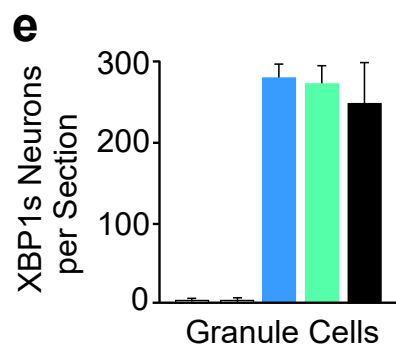

Supplementary Figure 14

Supplement: mp2016152x14.pdf [file mp2016152x14.pdf]

3xTgAD Mice  
Hippocampus  
8 Months

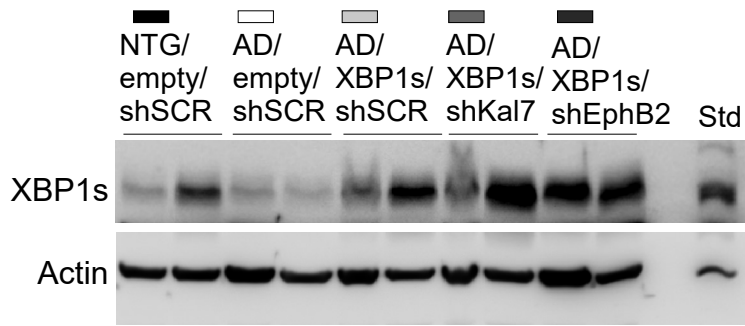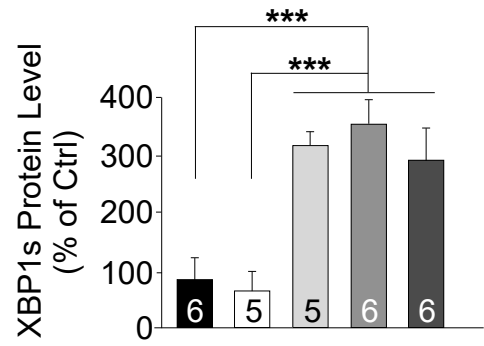

Supplementary Figure 15

Supplement: mp2016152x15.pdf [file mp2016152x15.pdf]

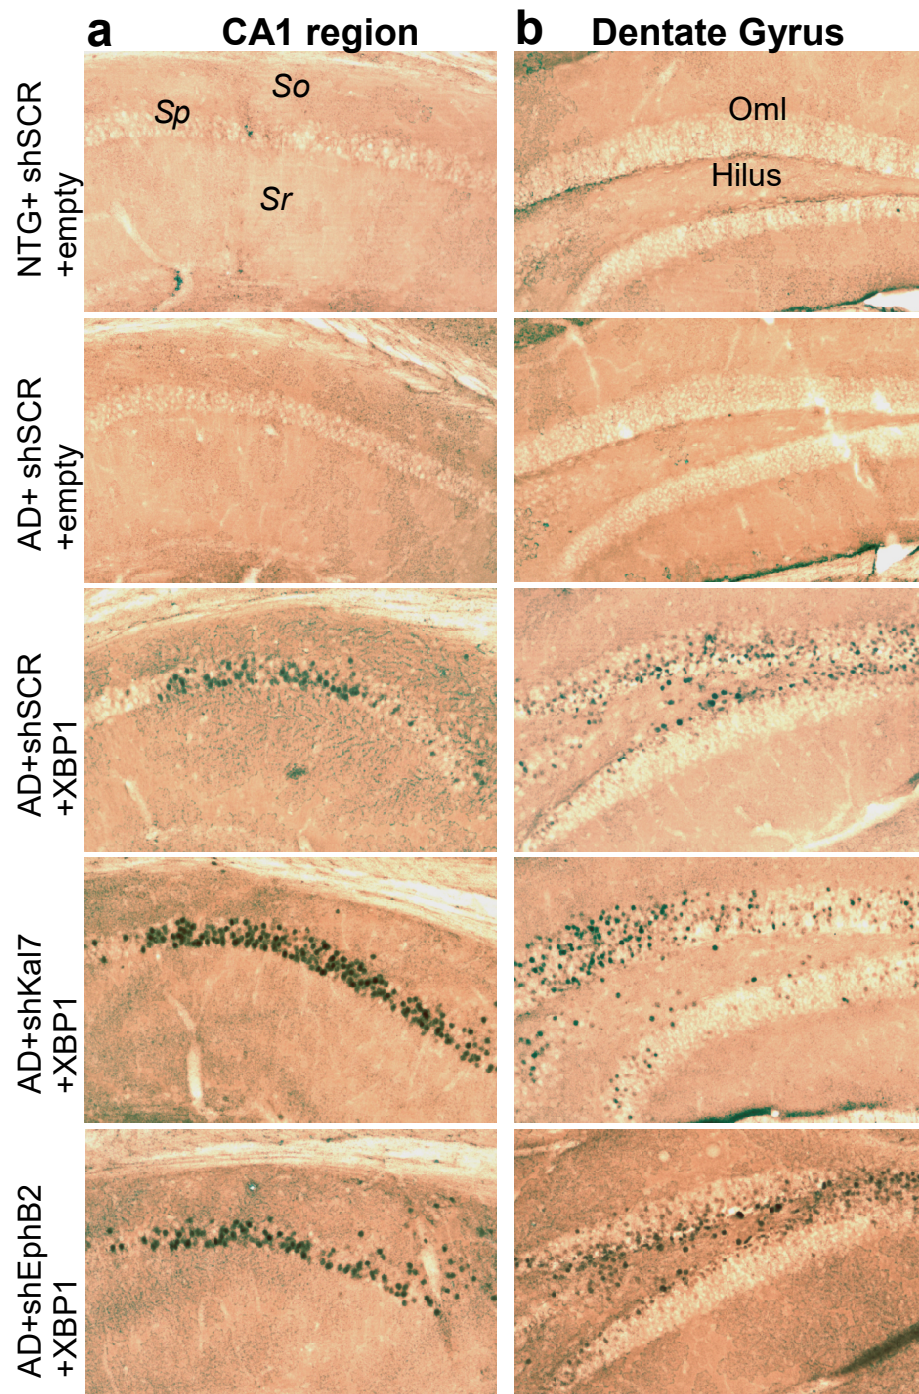

Supplementary Figure 16

Supplement: mp2016152x16.pdf [file mp2016152x16.pdf]

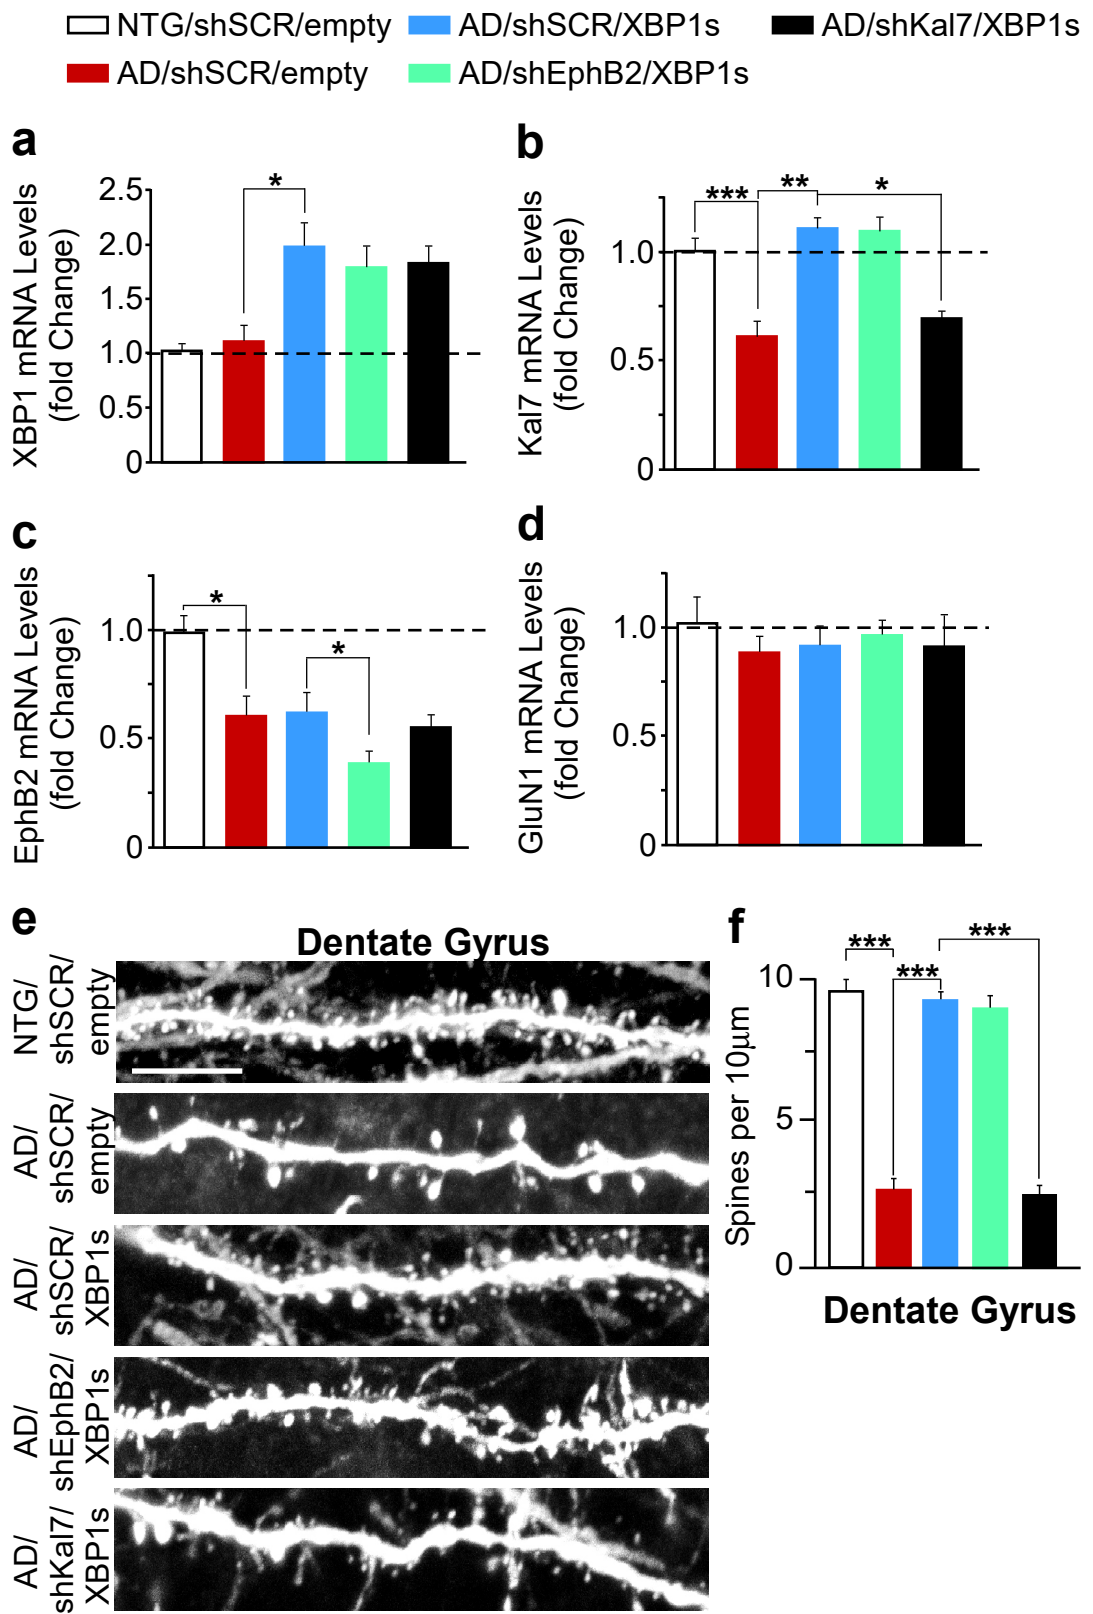

Supplementary Figure 17

Supplement: mp2016152x17.pdf [file mp2016152x17.pdf]

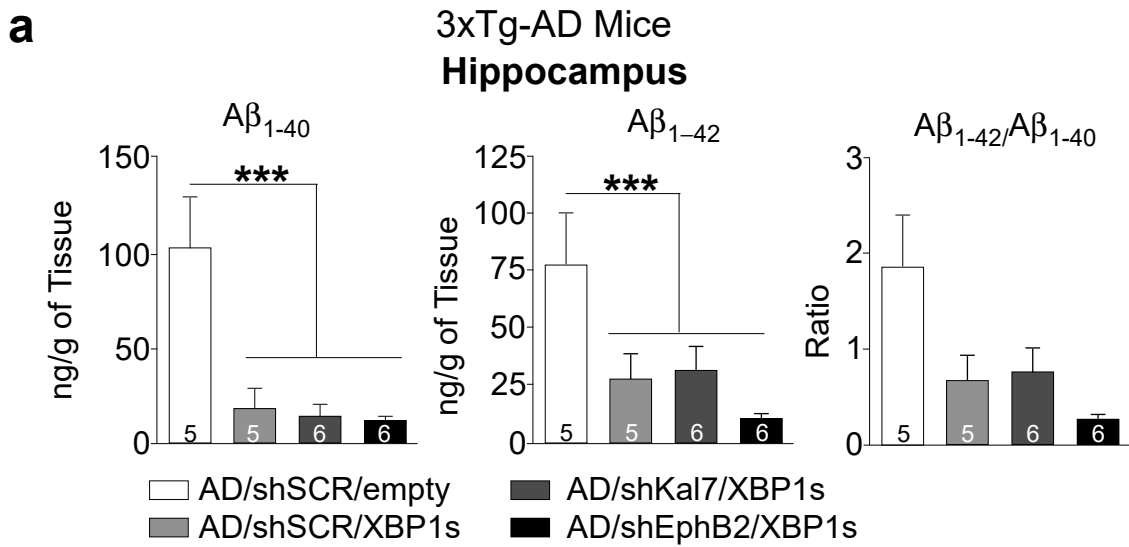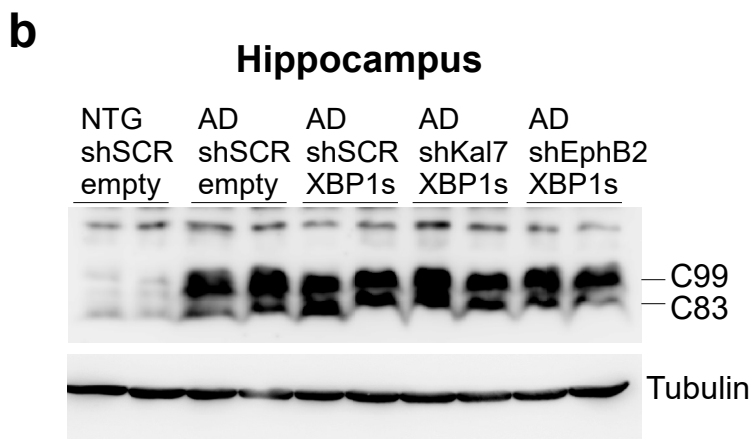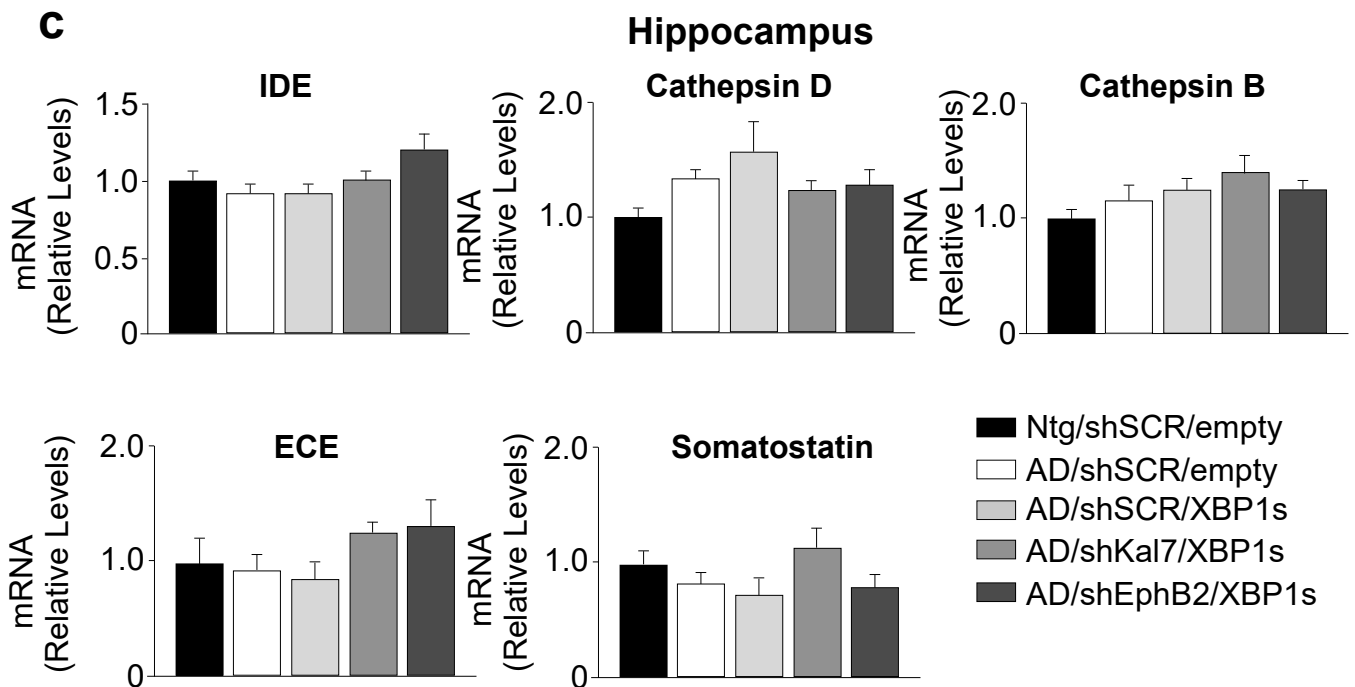

Supplement: mp2016152x18.pdf [file mp2016152x18.pdf]

■ NTG/shSCR/empty    ■ AD/shSCR/empty    □ AD/shSCR/XBP1s  
□ AD/shEphB2/XBP1s    ■ AD/shKal7/XBP1s

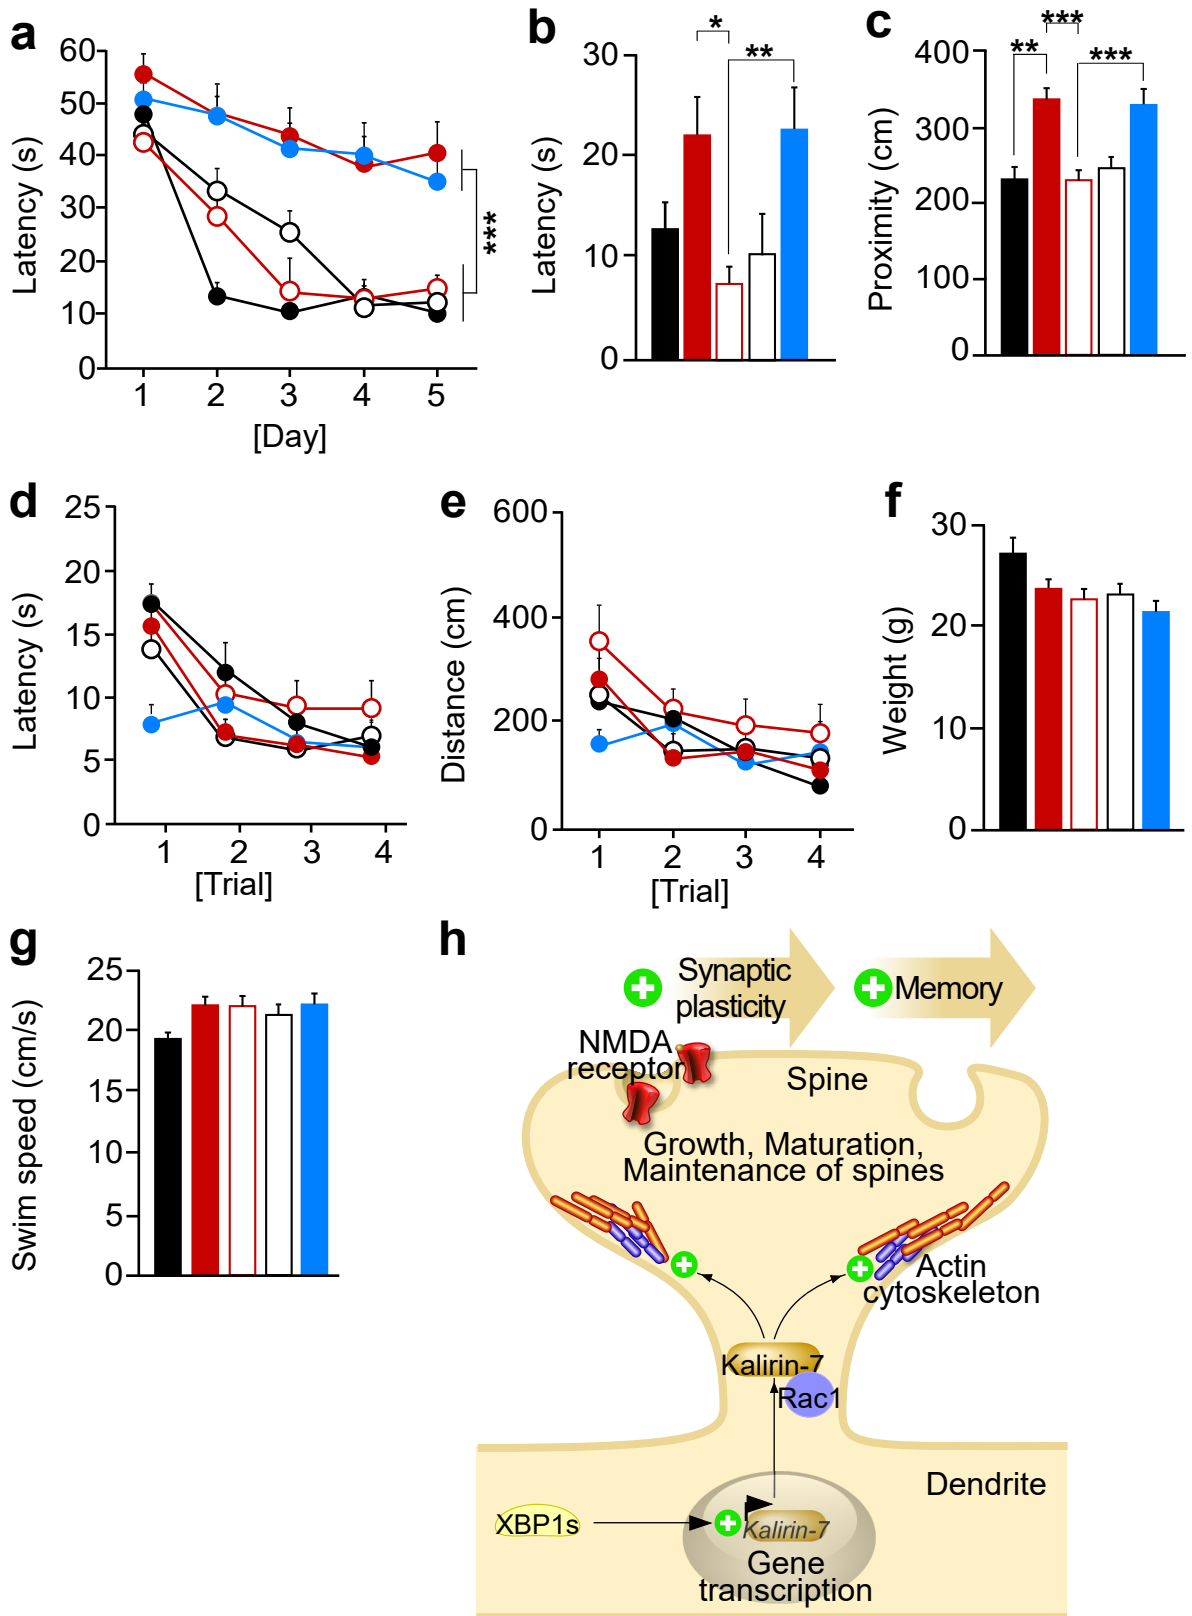

Supplementary Figure 19

Supplement: mp2016152x19.pdf [file mp2016152x19.pdf]

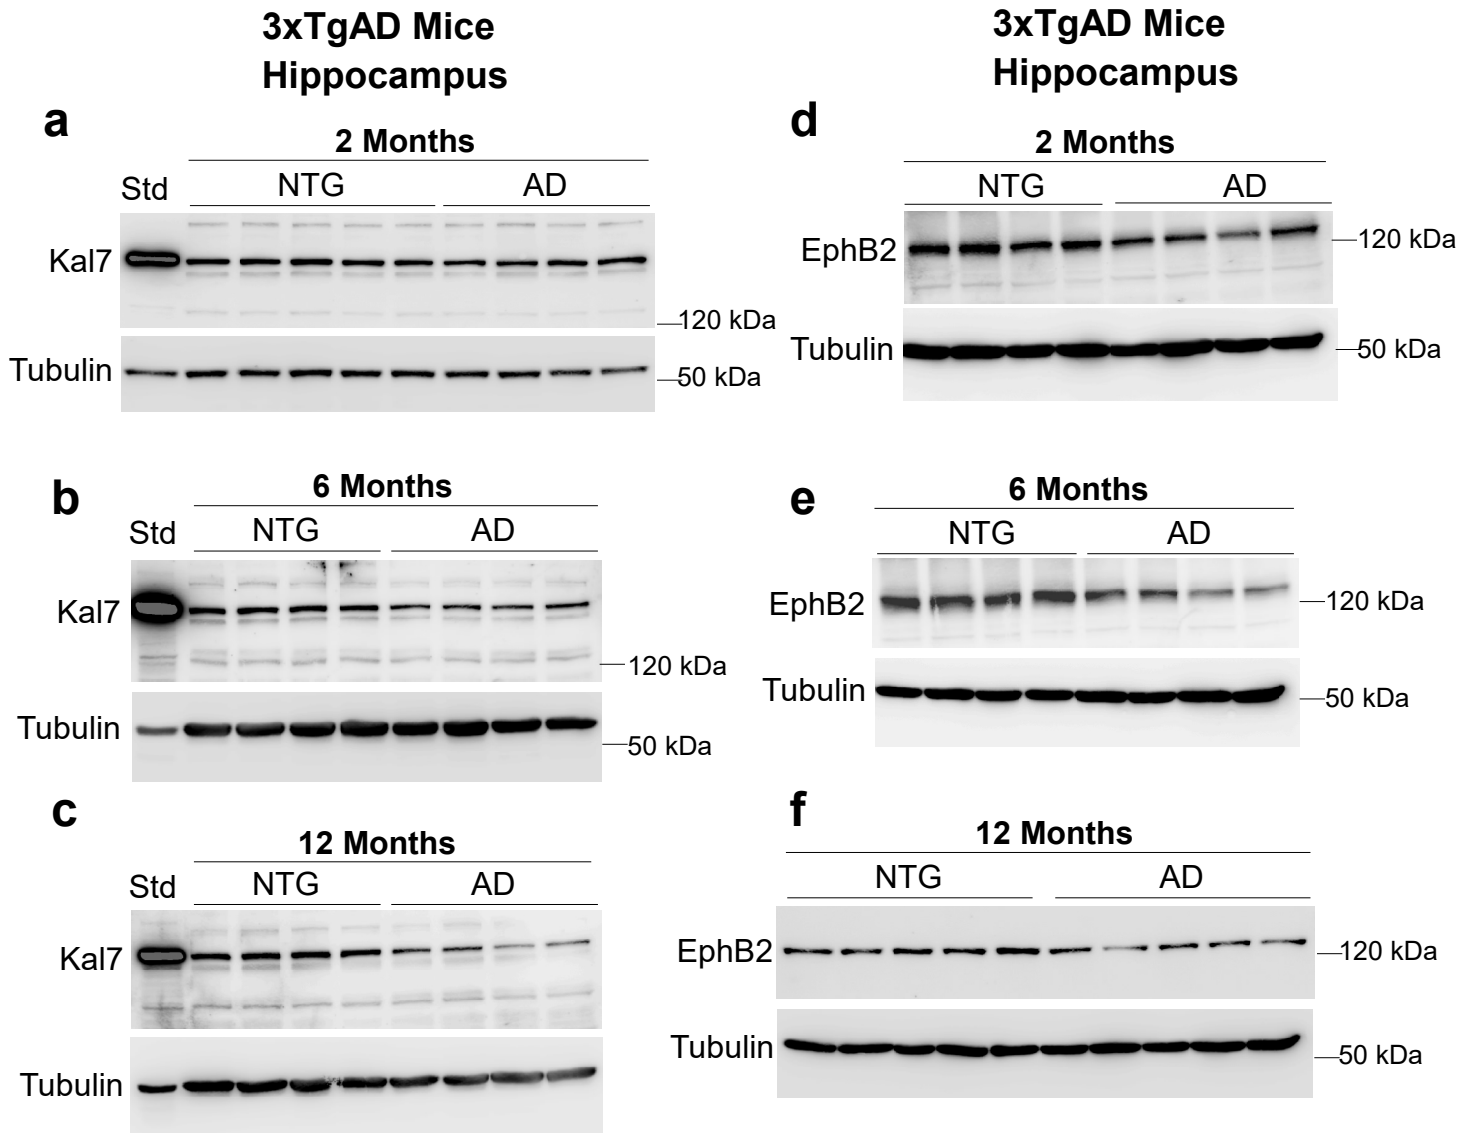

Supplementary Figure 2

Supplement: mp2016152x2.pdf [file mp2016152x2.pdf]

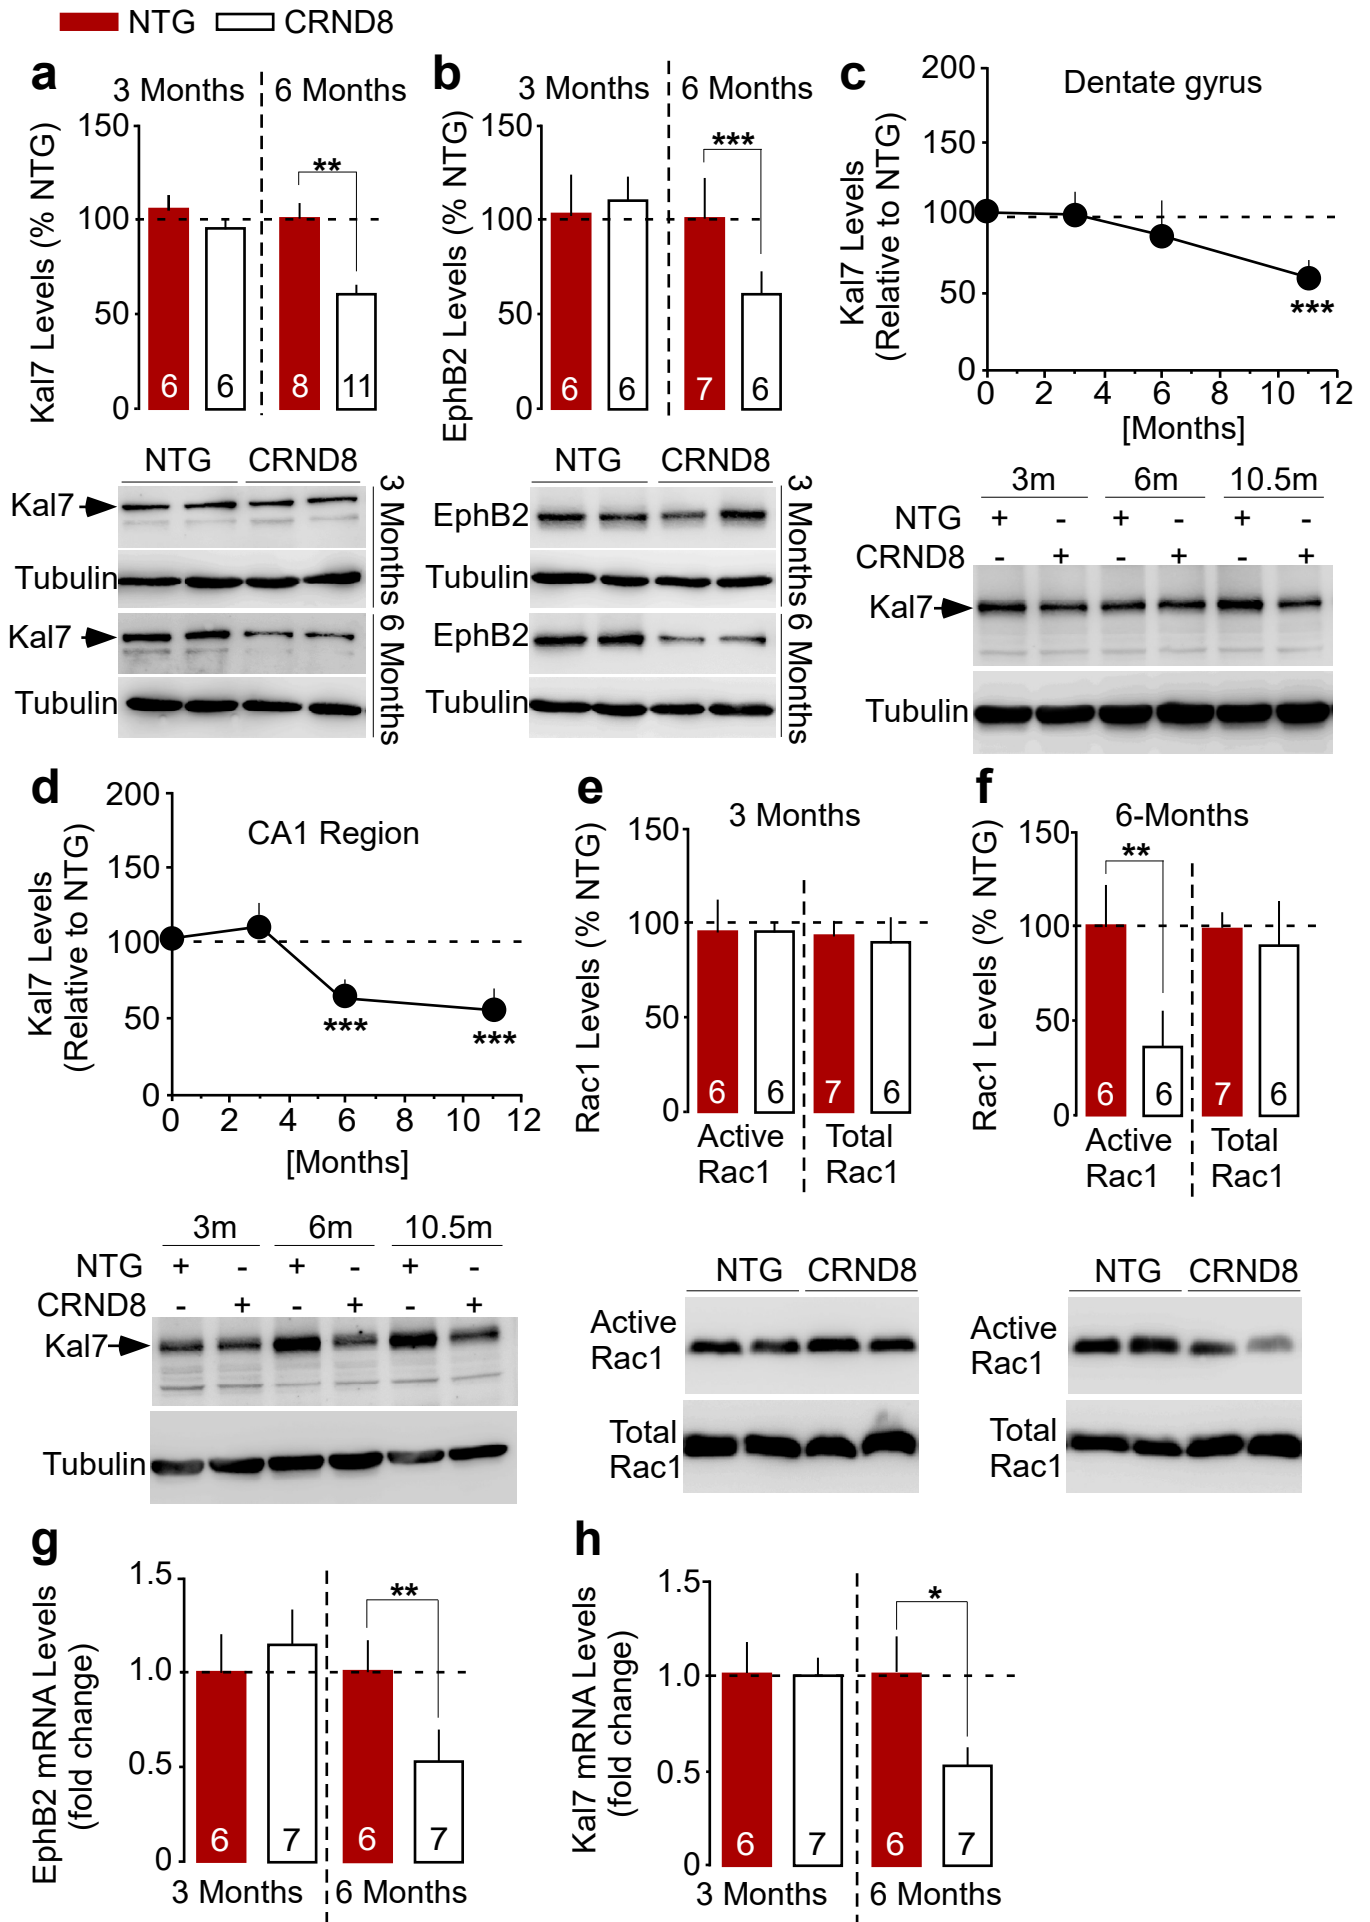

Supplementary Figure 3

Supplement: mp2016152x3.pdf [file mp2016152x3.pdf]

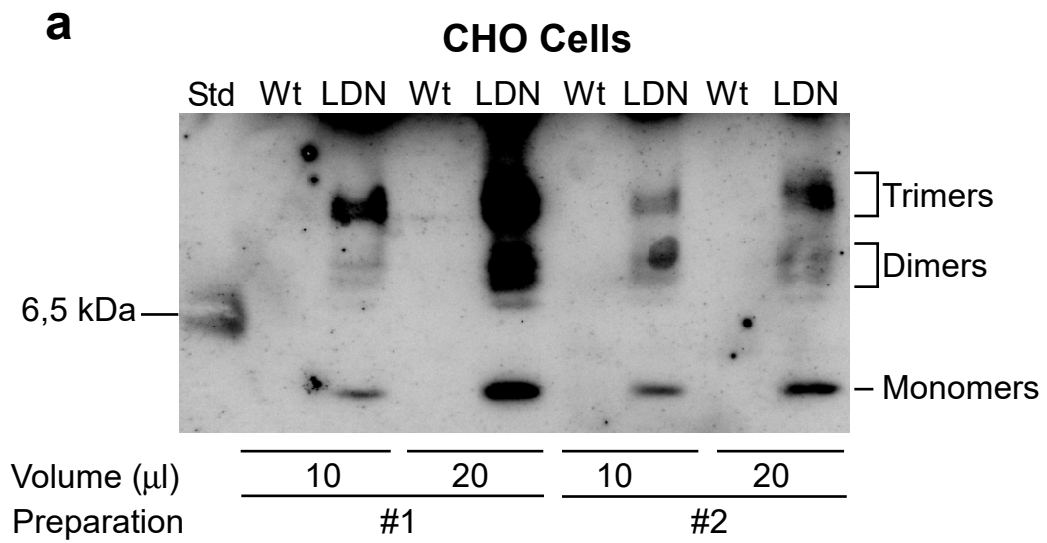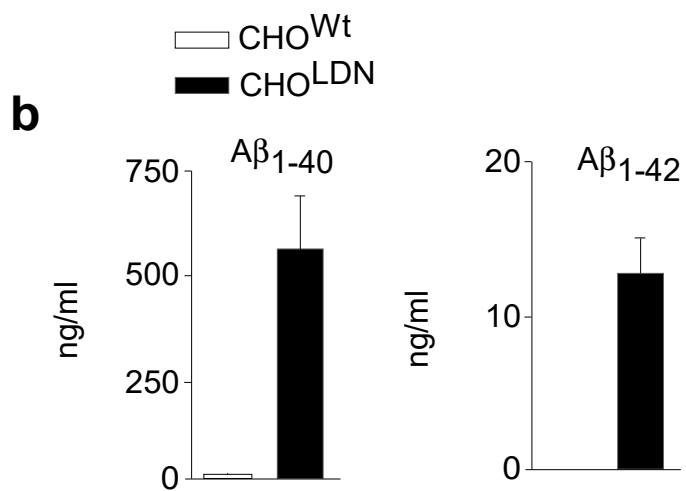

Supplementary Figure 4

Supplement: mp2016152x4.pdf [file mp2016152x4.pdf]

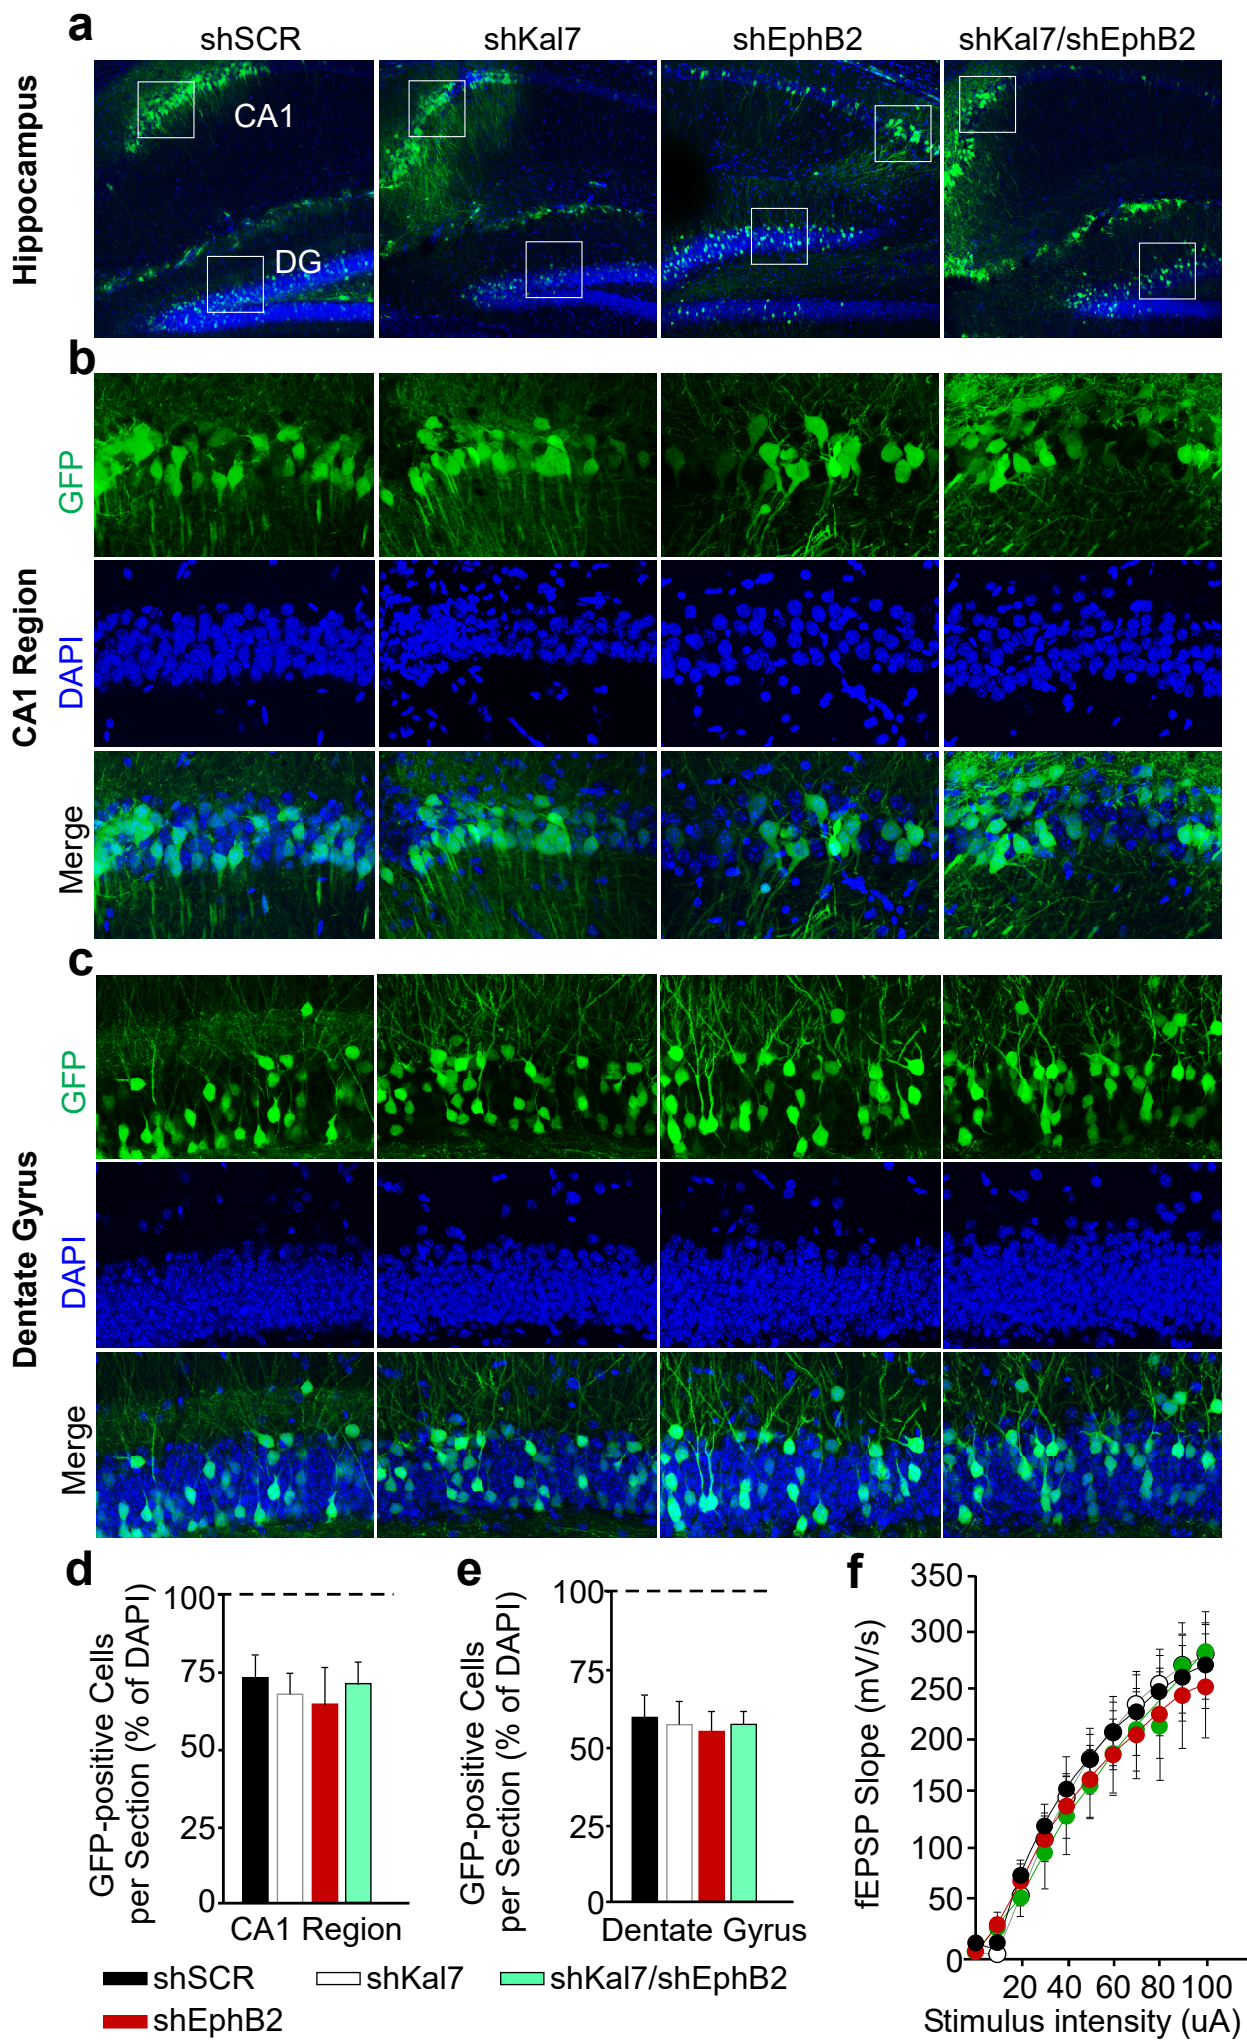

Supplementary Figure 5

Supplement: mp2016152x5.pdf [file mp2016152x5.pdf]

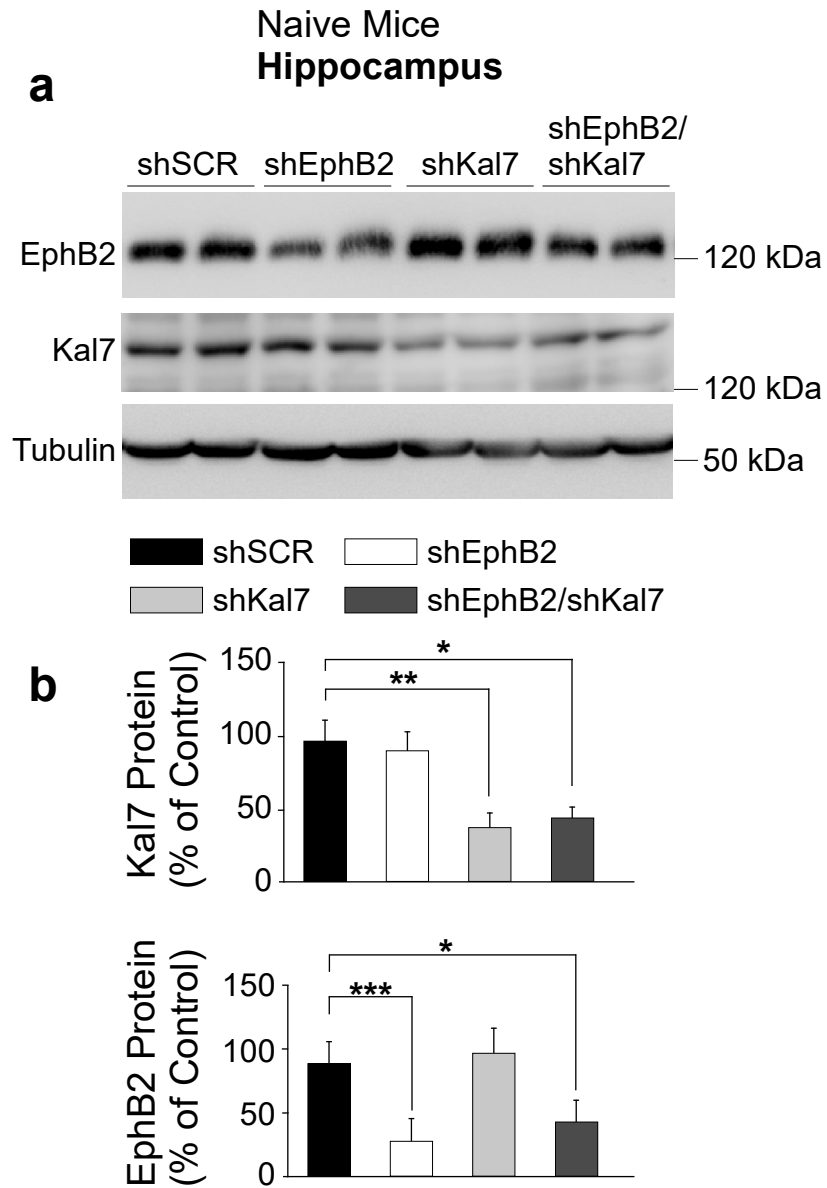

Supplementary Figure 6

Supplement: mp2016152x6.pdf [file mp2016152x6.pdf]

■ shSCR    □ shKal7    ■ shEphB2    ■ shKal7/shEphB2

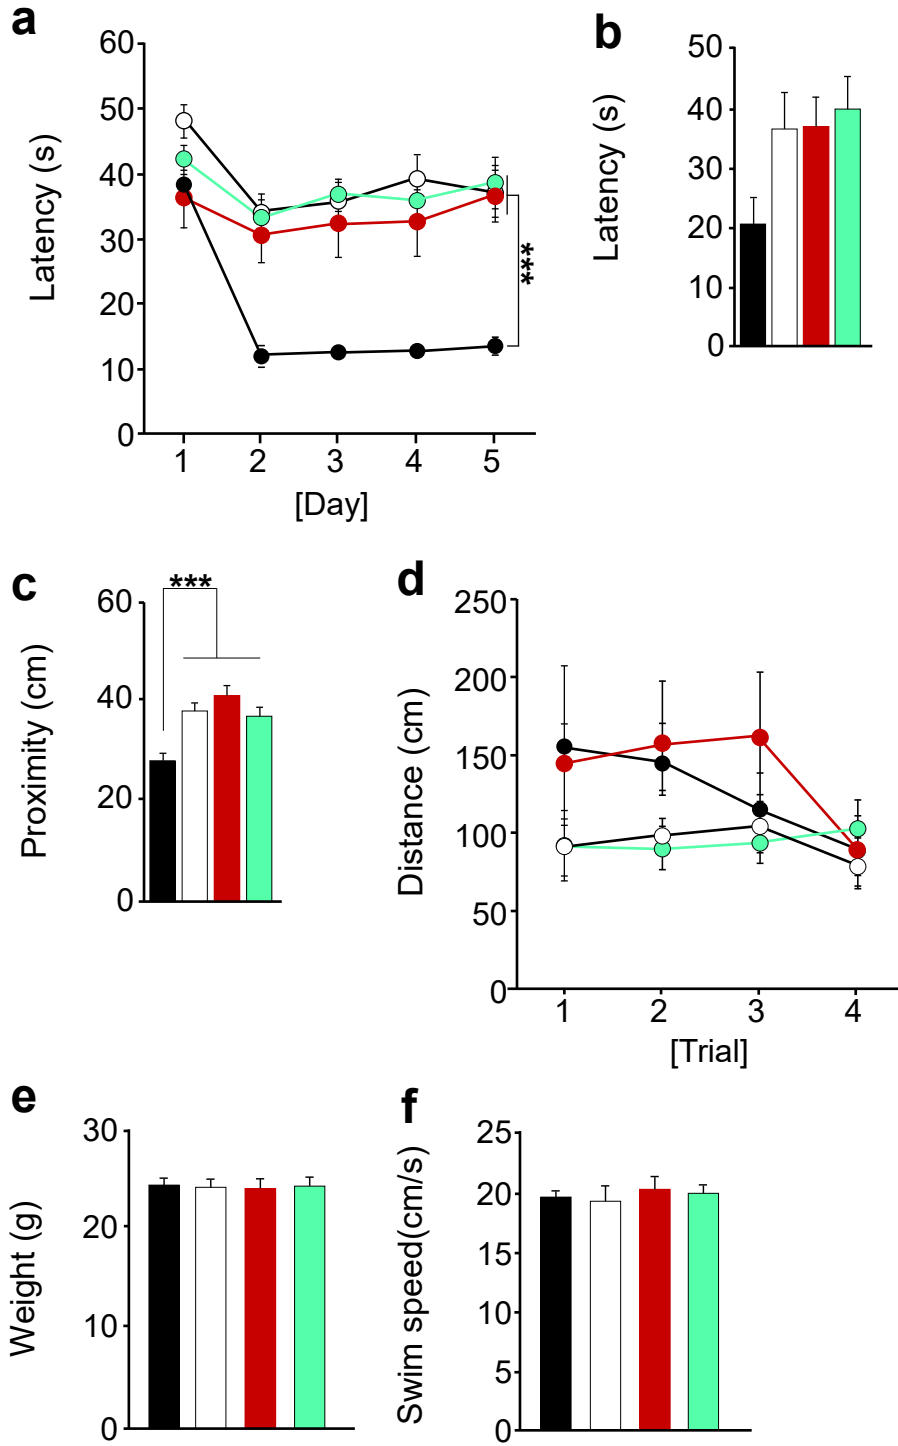

Supplementary Figure 7

Supplement: mp2016152x7.pdf [file mp2016152x7.pdf]

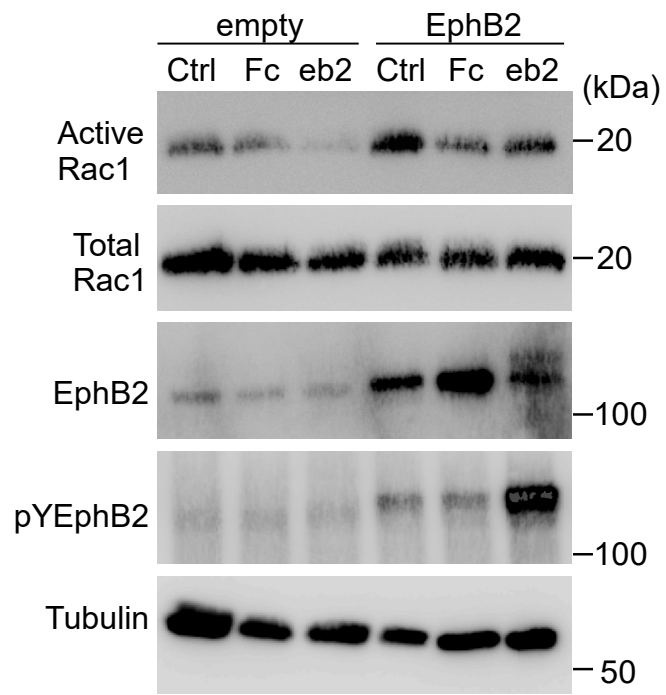

Supplementary Figure 8

Supplement: mp2016152x8.pdf [file mp2016152x8.pdf]

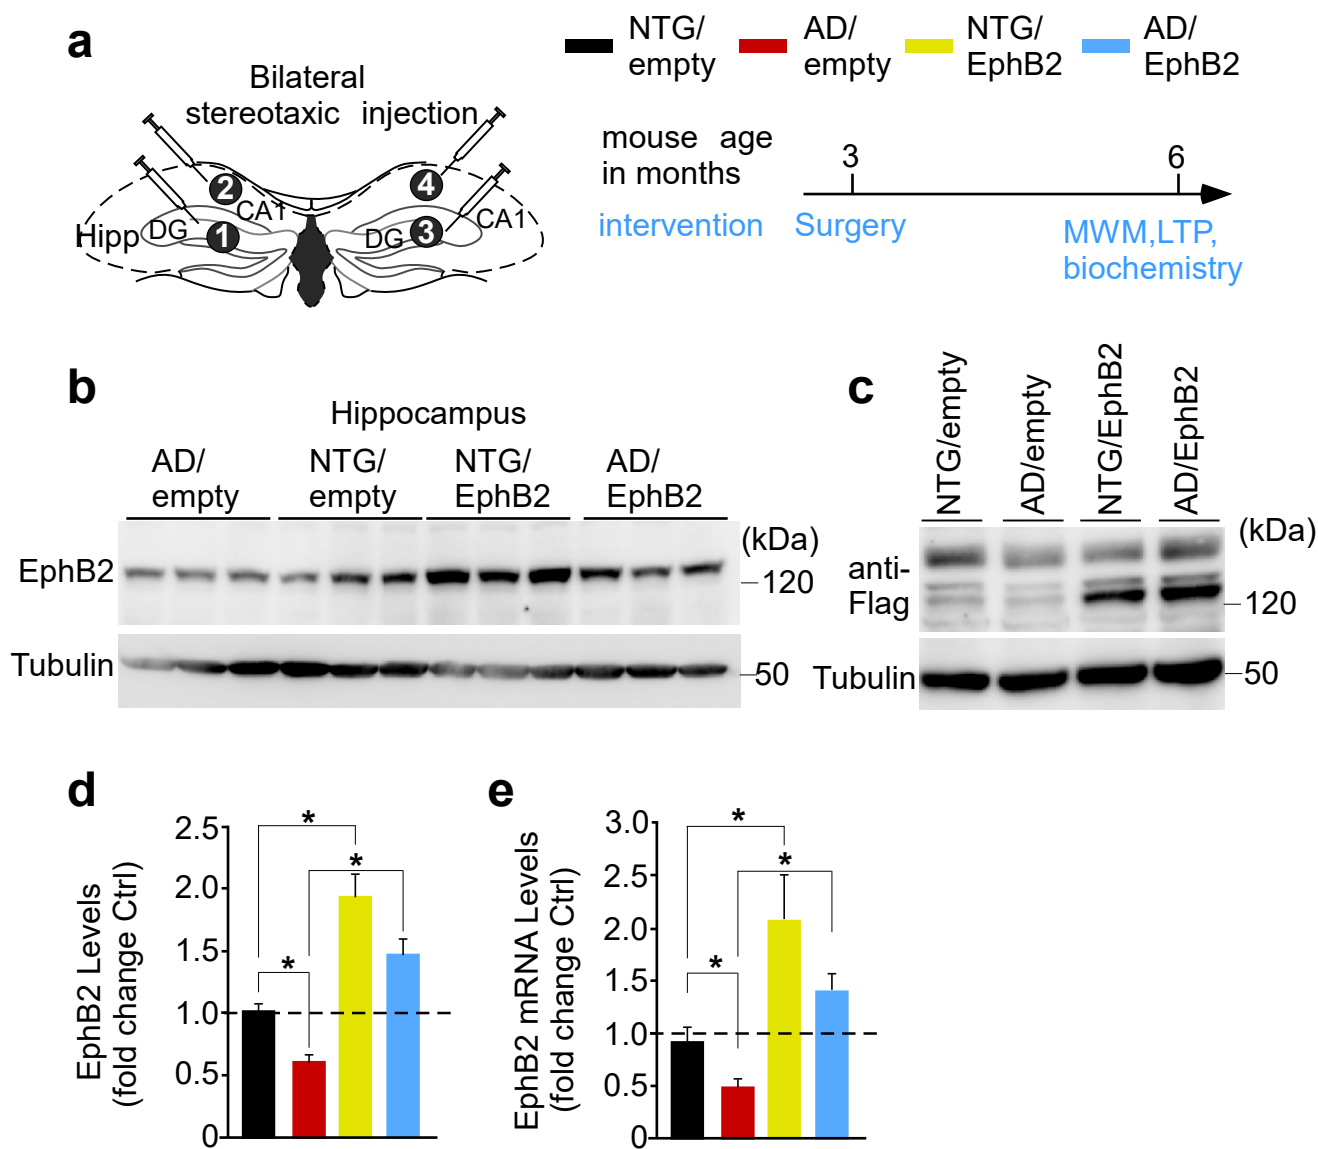

Supplementary Figure 9

Supplement: mp2016152x9.pdf [file mp2016152x9.pdf]
